# Supplementary material for: Integrative analysis of taurine metabolism-related genes prognostic signature with immunotherapy and identification of ABCB1 and GORASP1 as key genes in nasopharyngeal carcinoma
Source: Research Square preprint supplement (doi:10.21203/rs.3.rs-5670198/v1), 2024-12-23
Supplement: Supplementary file 1 [file d45aa232fc3d9ba2d2d474f6.xlsx]

## Sheet: Sheet1
CDO1
GAD1
GAD2
GADL1
CSAD
ADO
FMO1
FMO2
FMO5
FMO3
FMO4
GGT7
GGT6
GGT1
GGT5
BAAT
SLC6A6
TUG1
MPO
GLRA1
NR1H4
SLC36A1
SLC16A6
GARS1
FAAH
AKR1B1
TNF
IL6
CYP7A1
GPHN
ABCB11
FABP6
NOS2
MOCS2
GABBR1
GLRA2
PTPN3
CAV1
MOCS1
SLC6A13
SLC27A5
SLC8A1
GJB2
WT1
CXCL8
ENO2
UCP2
ABAT
LRRC8A
LRRC8D
LRRC8C
EPX
HMOX1
SLC6A11
IL1B
NFAT5
GABRA5
DUSP19
GLS
ABCC2
LRRC8B
LRRC8E
ALOX12
SLC51A
SLC51B
PLA2G2A
GLRA3
APOB
DHRS9
GAPDH
HSD11B1
GABRB2
GLRB
GAMT
GABRG2
CYP3A4
GRIN2B
GABRA6
ALOX15
IL2
CBS
GPR158
GTPBP3
GABRA4
GABRG1
GAL
CALB1
CFTR
PPCS
TGFB1
IFNG
SLCO1A2
ALOX15B
SOD1
ANXA5
GPT
SLC10A2
SLC22A2
CASP9
GABRB3
GABRA1
GABRA2
GABRB1
GABRA3
GABRD
HPN
GABRG3
SLC15A1
GABRE
GABRQ
TGM6
GABRP
SLC7A11
SLC6A14
XDH
NR1H2
SLC5A1
TP53
TIMP1
CASP3
IL1A
EGFR
PTK2B
BAX
CYP2D6
BDNF
ALDH5A1
GATM
INS
ALOX5
APOA1
ABCC1
VEGFA
CAMK2G
KRIT1
PDP1
ABCG2
HNF4A
CEL
ABCC4
CCK
SLC22A8
GPLD1
ABCB1
HMGCR
ABCB4
SLCO1B1
ABCC3
ADPRH
SOAT1
CAT
PPARG
SUCLG1
MMP13
CHUK
PNPO
MMP1
LPL
GBA1
PNLIP
PSAP
SCARB1
SLC16A1
C1S
APOC3
SLC22A6
SLC22A1
SLCO1B3
TMPRSS15
ABCC11
SLC10A1
ATP8B1
GAST
SLCO1C1
SLCO2B1
SLCO4A1
ENPP7
SLCO3A1
ABCC10
SCT
AOX1
SUOX
MOCS3
APP
SLC6A18
AGT
BCL2
ADSL
SPESP1
AKR1C4
PIK3CG
AKR1D1
ELANE
SRC
OLR1
JUN
CP
MYB
PON1
EGR1
ODC1
SLC17A5
NPPA
TXNIP
GUCA2A
PARP1
CTH
ALPL
SORD
KCNJ11
RNASE3
CDKN1B
HTR2A
HTT
CSN1S1
PLA2G1B
STAT5A
MAPK1
MAPK14
MAPT
GCK
SLC2A2
IGF1
CAST
LOX
ABCC8
CALM1
PDX1
TSPO
NUMA1
PDLIM3
NR3C2
HSD11B2
SRD5A1
MAPK3
ADCY1
NR1H3
DDAH2
CXCL2
PIK3R1
TJP1
GORASP1
AGMAT
ARL6IP5
ACE
CD36
PIK3CB
ADIPOQ
HSPA1A
LEP
VDAC1
NES
GABRR1
GHR
PTGS2
CYP2E1
FGF2
CHKA
EPO
CCNC
ACSS2
ALDH1L1
CCL27
DAO
KCNQ1
HSP90B1
OGDH
IL17A
MMP9
MMP2
CYBB
OXTR
SLC5A2
CYBA
CS
NCF2
BTD
PLPBP
ALDH7A1
HSF1
SLC6A12
KYNU
TRMU
NFE2L2
SLC1A3
APRT
NT5C2
PSPH
SLC19A3
KCNT1
SLCO2A1
RAPSN
MSMB
NT5C
MTARC2
AURKA
PRDX1
OPRM1
PTEN
CDC42
IGF2BP2
LRG1
DDC
SULT2A1
GPBAR1
MYLK
F12
MS4A1
GRK6
TEAD1
NARS2
NLRP12
CNTN6
KCNK1
MUC4
COA6
CSMD1
NOVA1
MUC20
GDAP2
TENM4
SLC35F3
MAP3K21
MS4A14
MS4A7
MS4A6E
RASSF10
MS4A5
ALDH3A1
MRGPRD
POMC
STAT3
PHGDH
STAT5B
JAK2
ALB
SLC6A8
SLC5A3
MTDH
F5
RAF1
STAT1
SLC7A5
SLC4A1
KCNQ2
PDXK
QDPR
ALDH4A1
SCRN2
PRR15L
F2R
ITGA5
CNDP1
CARNS1
SYK
LYN
FYN
PLA2G4A
SLC5A6
SLC38A2
TXN
PXDN
PTK2
CRYAB
GHRL
CD40LG
MAPK8
IRS1
PC
CLCN3
HLA-C
NAGLU
GCG
MTO1
SLC27A1
DPYD
ALDH2
UGT1A1
CYCS
SLC9A3
MC4R
ABCG5
ALDH3A2
ALDH1A3
UPB1
ABCG8
ALDH1B1
ALDH9A1
ALDH3B1
CPQ
ALDH3B2
SLC16A10
ERBB4
SNCA
FAS
SCN8A
MAP3K5
DLD
GOT2
YY1
IDO1
XBP1
CFL1
ATXN1
FMR1
KPNA2
SLPI
WNK3
IAPP
ATP8A1
GTPBP1
SMURF2
MSRB1
FOXQ1
YOD1
DRD2
GRM5
DRD1
TNFSF10
EZH2
PIK3CA
EGF
CYP7B1
CASP8
F2
TNFRSF1A
CACNA1B
GATA4
REN
MCL1
TRPV1
BIRC5
TRAF3
DMD
F3
FADD
TPH1
CHRNA7
GRM3
UBC
PER2
TRADD
MSRA
PDK2
TNFRSF21
UTRN
MSRB2
OVGP1
PNOC
DAOA
GYPE
ADA
GLUD1
SLC22A5
SLC27A2
MTOR
GJA1
NOS3
RXRA
VDR
AGER
MYCN
MAOB
NPY
SST
SLC22A13
C19orf12
FAAH2
CTNNB1
GSR
HSPA8
GLUL
SCNN1B
PAH
PRKAB1
CYP27A1
LTF
TCF7L2
ABCA4
PPARA
FABP1
FGF19
RLBP1
SRF
DNM3
EHHADH
PCSK6
BBC3
RNASE1
RGS7
SLC25A17
GET1
FGFR2
AKT1
CCND1
INSR
NOTCH1
UCHL1
FGFR4
HSP90AA1
HSPB1
LDLR
NOTCH3
PLK1
TERT
B2M
CREB1
GSTP1
SLC12A2
TF
ZAP70
ARG1
CES1
EDN1
IGF2
ITGB1
NR5A1
SCNN1A
SERPINA1
SGK1
SIRT1
SLC1A1
SREBF1
TRPC6
CHRM3
GFAP
HMGB1
HPRT1
IDE
PRKCZ
AFP
ESRRB
FGF1
FURIN
NCOA3
RHO
SCNN1G
SLC3A1
SOD2
TTN
VCL
YAP1
GATA1
HSD17B4
ITGA2
MAPK10
SLC6A1
SOX2
TP63
ACVR1B
AGXT
AMACR
ARG2
DUSP1
FBXW7
HP
PRTN3
SERPINF2
GCLC
MBP
RPE65
S100B
SLC1A4
SLIT2
VIP
ACP1
ADCY10
ATP2A3
CPA6
CRH
FABP3
FOXA1
LIMK2
OCLN
RPS27A
SOX4
ACKR1
ASPA
CD1D
ENTPD2
IGFBP5
S1PR2
BLVRB
FABP2
FABP5
GLUD2
NTS
POU2F1
PVALB
TIMP2
CELF1
LPO
ASRGL1
HOXB7
LIN28A
RCVRN
SLC38A1
CLPS
KLF2
SGK3
SLC27A6
SMC2
PATZ1
PCDH1
PFN2
FXYD1
RGS1
SLC38A4
ARSH
TESC
